# Supplementary material
Source: publisher figshare collection journal article supplement (https://gsajournals.figshare.com/articles/dataset/_/6686420)
Supplement: Supplementary file 1 [file 1]

Table1. Strains used in this study

| Strain        | MAT      | Genotype                                                    | Source                        |
|---------------|----------|-------------------------------------------------------------|-------------------------------|
| DK186         | a        | <i>bar1</i>                                                 | Altman and Kellogg, 1997      |
| DDY903        | a        | <i>S288C</i> background                                     | Gift of D. Drubin             |
| DK647         | a        | <i>bar1 rts1Δ::kanMX6</i>                                   | Artiles et al., 2009          |
| DK2876        | a        | <i>bar1 ypk1-L424A ypk2Δ::HisMX6</i>                        | Clarke et al., 2017           |
| DK3267        | a        | <i>bar1 lag1Δ::kanMX6 lac1Δ::HIS</i>                        | This study                    |
| SH341         | a        | <i>bar1 pph21Δ1::HIS pph22-172::URA3</i>                    | This study                    |
| AS1           | a        | <i>bar1 elm1Δ::TRP</i>                                      | Sreenivasan and Kellogg, 1999 |
| DK3376        | a        | <i>bar1 elm1Δ::TRP tos3Δ::HIS sak1Δ::KanMX6</i>             | This study                    |
| KA22          | a        | <i>bar1 snf1Δ::KanMX6</i>                                   | This study                    |
| RA4           | a        | <i>bar1 gin4Δ::LEU2</i>                                     | Altman and Kellogg, 1997      |
| HT159         | a        | <i>bar1 hsl1Δ::HIS5</i>                                     | This study                    |
| ZZ1           | a        | <i>bar1 kcc4Δ::URA</i>                                      | This study                    |
| DK2275        | a        | <i>bar1 gin4Δ::LEU2 hsl1Δ::HIS kcc4Δ::URA</i>               | This study                    |
| DK847         | a        | <i>bar1 elm1Δ::LEU rts1Δ::KanMX6</i>                        | Artiles et al., 2009          |
| DK2250        | a        | <i>bar1 gin4Δ::LEU2 hsl1Δ::HIS kcc4Δ::URA rts1Δ::KanMX6</i> | This study                    |
| DK2326        | a        | <i>bar1 MSS4-3xHA::HisMX6</i>                               | This study                    |
| DK3407        | a        | <i>bar1 MSS4-3xHA::HisMX6 elm1Δ::LEU2</i>                   | This study                    |
| <b>DK3190</b> | <b>a</b> | <b><i>bar1 yor1Δ::KanMX6</i></b>                            | <b>Lucena et al., 2018</b>    |
