# Supplementary material
Source: publisher figshare collection journal article supplement (https://gsajournals.figshare.com/articles/dataset/_/6686420)

Figure S1

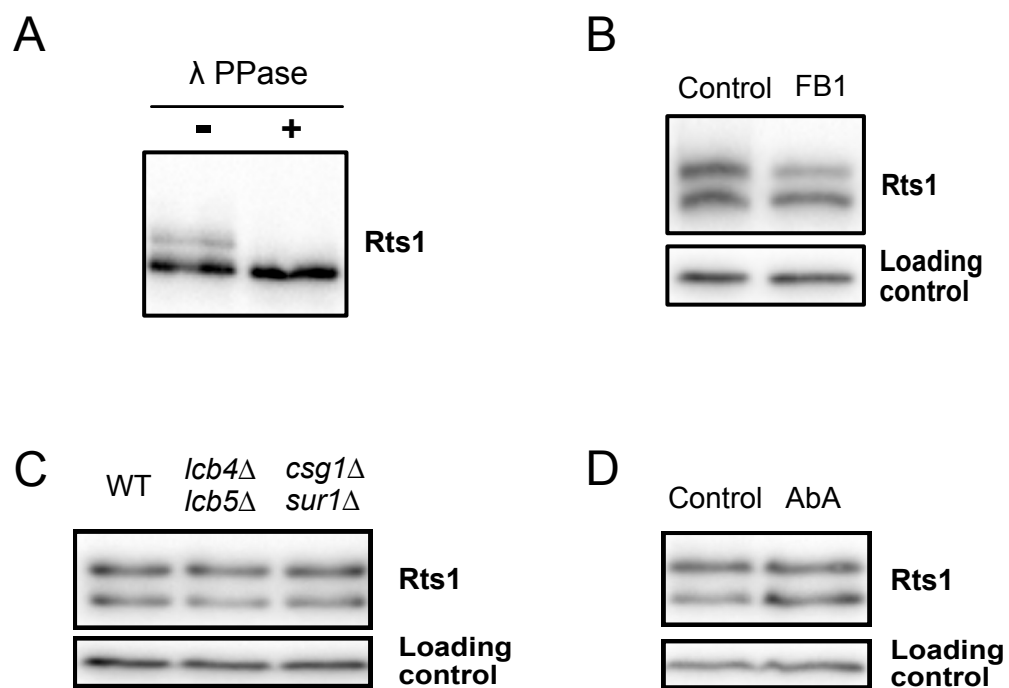

Figure S2

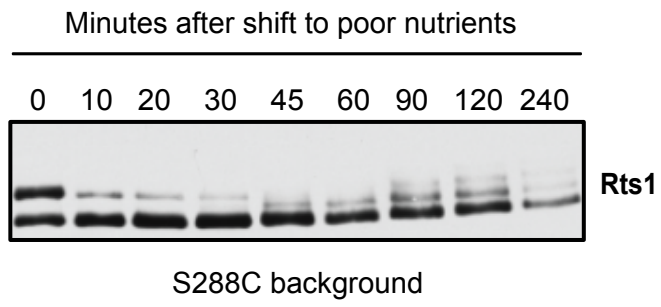

Figure S3

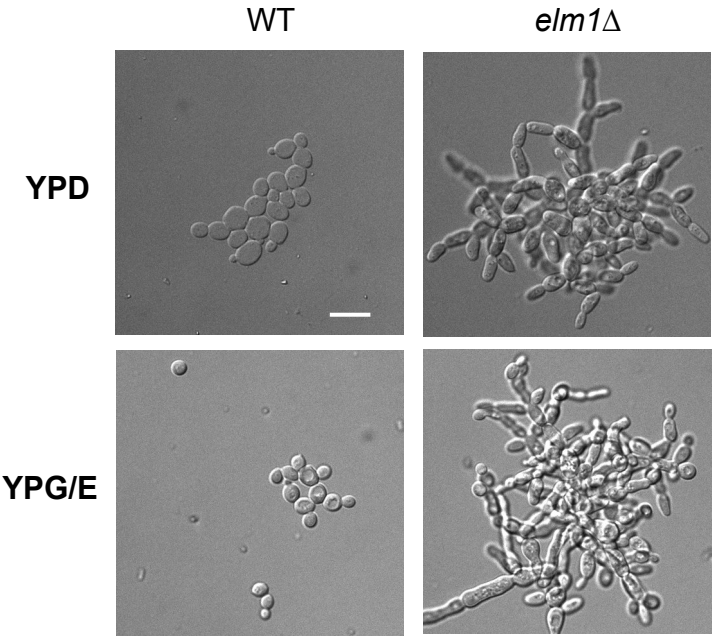

Supplement: Supplementary file 2 [file 1]
